# Supplementary material for: Eight-armed polydiacetylene under benzoxazine dimer branched polylactide: a structural combination for reversible thermochromic effects and a model case for free-standing poly(lactic acid) films
Source: Royal Society of Chemistry journal article supplement (doi:10.1039/c7tc02072d), 2017-01-01
Supplement: c7tc02072d2.pdf [file c7tc02072d2.pdf]

### 23 **Synthesis of linear polylactide conjugated diacetylene (linear PLLA-DA)**

24 Phenol (37.8 mg, 0.4 mmol), tin(II) 2-ethylhexanoate (40.5 mg, 0.1 mmol), and L-  
25 lactide (1441.4 mg, 10 mmol) were dried under vacuum for 3 hours. The ring opening  
26 polymerization was performed under N<sub>2</sub> at 120 °C in bulk state until it becomes a viscous. The  
27 product was precipitated in cold diethyl ether to obtain linear polylactide with 98 %conversion.  
28 <sup>1</sup>H NMR (500 MHz, CDCl<sub>3</sub>, ppm): 7.36 (m, 2H, Ar-H), 7.07 (m, 1H, Ar-H), 6.90 (t, 1H, Ar-  
29 H), 6.80 (d, *J* = 8.37 Hz, 1H, Ar-H), 5.14 (dd, *J* = 6.89, 13.97 Hz, 39H, -OCH(CH<sub>3</sub>)C(O)- of  
30 PLLA), 4.33 (d, *J* = 6.88 Hz, 1H, terminal -OC(O)CH(CH<sub>3</sub>)-OH), 1.55 (t, 120H,  
31 OCH(CH<sub>3</sub>)C(O)- of PLLA). <sup>1</sup>H NMR analysis indicated a DP<sub>n</sub> of 20 lactide units per chain.  
32 GPC analysis indicated *M*<sub>n</sub> = 2999 g mol<sup>-1</sup> and *M*<sub>w</sub>/*M*<sub>n</sub> = 1.10.

33 The conjugation reaction of linear polylactide with 10,12-pentacosadiynoic acid  
34 (149.8 mg, 0.4 mmol) was proceeded as the same procedure as 4BzD-8PLLA-8DA to obtain  
35 PLLA-DA with 92 %yield. <sup>1</sup>H NMR (500 MHz, CDCl<sub>3</sub>, ppm): 7.36 (d, *J* = 8.35 Hz, 2H, Ar-  
36 H), 7.06 (d, *J* = 7.50 Hz, 1H, Ar-H), 6.89 (m, 1H, Ar-H), 6.79 (d, *J* = 8.33 Hz, 1H, Ar-H), 5.14  
37 (dd, *J* = 6.92, 14.01 Hz, 36H, -OCH(CH<sub>3</sub>)C(O)- of PLLA), 4.34 (s, 1H, terminal -  
38 OC(O)CH(CH<sub>3</sub>)-OH), 2.51 (s, 2H, -OC(O)CH<sub>2</sub>- of DA), 2.22 (t, 4H, -(CH<sub>2</sub>)C≡C- of DA),  
39 1.55 (t, 111H, OCH(CH<sub>3</sub>)C(O)- of PLLA), 1.25 (m, 32H, -CH<sub>2</sub>- of DA) 0.86 (t, 3H, -CH<sub>3</sub> of  
40 DA). GPC analysis indicated *M*<sub>n</sub> = 3099 g g mol<sup>-1</sup> and *M*<sub>w</sub>/*M*<sub>n</sub> = 1.00.

41

### 42 **Synthesis of 4 arms polylactide conjugated diacetylene (4PLLA-4DA)**

43 Pentaerythritol (27.2 mg, 0.2 mmol) was used as initiator for ring opening  
44 polymerization of L-lactide (2882.8 mg, 20 mmol) in bulk at 120 °C with tin(II) 2-  
45 ethylhexanoate catalyst (81.0 mg, 0.2 mmol). At the end of the reaction, the medium was  
46 viscous. The product obtained was precipitated in cold diethyl ether and dried under vacuum  
47 to obtain 4 arms polylactide (4PLLA) with the yield of 95%. <sup>1</sup>H NMR (500 MHz, CDCl<sub>3</sub>, ppm):

48 5.14 (d,  $J = 7.11$  Hz, 44H, -OCH(CH<sub>3</sub>)C(O)- of PLLA), 4.34 (s, 1H, terminal -  
49 OC(O)CH(CH<sub>3</sub>)-OH), 3.51 (m, 2H, C(CH<sub>2</sub>)-O-PLLA), 1.56 (t, 135H, OCH(CH<sub>3</sub>)C(O)- of  
50 PLLA). <sup>1</sup>H NMR analysis indicated a DP<sub>n</sub> of 22 lactide units per chain. GPC analysis indicated  
51  $M_n = 19963$  g mol<sup>-1</sup> and  $M_w/M_n = 1.21$ .

52 4PLLA and 10,12-pentacosadiynoic acid (149.8 mg, 0.4 mmol) was conjugated as the  
53 same procedure as 4BzD-8PLLA-8DA to obtain 4PLLA-4DA with 87 %yield. <sup>1</sup>H NMR (500  
54 MHz, CDCl<sub>3</sub>, ppm): ), 5.14 (dd,  $J = 6.89, 13.89$  Hz, 32H, -OCH(CH<sub>3</sub>)C(O)- of PLLA), 4.35  
55 (s, 1H, terminal -OC(O)CH(CH<sub>3</sub>)-OH), 3.49 (m, 2H, C(CH<sub>2</sub>)-O-PLLA), 2.58 (s, 2H, -  
56 OC(O)CH<sub>2</sub>- of DA), 2.22 (s, 4H, -(CH<sub>2</sub>)C≡C- of DA), 1.48 (t, 131H, OCH(CH<sub>3</sub>)C(O)- of  
57 PLLA and -CH<sub>2</sub>- of DA) 0.86 (t, 3H, -CH<sub>3</sub> of DA).

58

### 59 **Synthesis of hyperbranched polylactide conjugated diacetylene (mPEI-PLLA-DA)**

60 Ring opening polymerization of L-lactide (4571.7 mg, 31.7 mmol) was proceeded in  
61 bulk at 120 °C with tin(II) 2-ethylhexanoate catalyst (81.0 mg, 0.2 mmol) by using branched  
62 polyethyleneimine (93.5 mg, 1.6 mmol) as an initiator. The crude product was precipitate in  
63 cold methanol to obtain hyperbranched polylactide (mPEI-PLLA) at 98 %yield. <sup>1</sup>H NMR (500  
64 MHz, CDCl<sub>3</sub>, ppm): 5.14 (dd,  $J = 6.81, 13.89$  Hz, 1634H, -OCH(CH<sub>3</sub>)C(O)- of PLLA), 4.34  
65 (s, 43H, terminal -OC(O)CH(CH<sub>3</sub>)-OH), 3.72 (dd,  $J = 8.65, 14.35$  Hz, 172H, -NH- and -NH<sub>2</sub>  
66 of mPEI), 1.54 (m, 5031H, OCH(CH<sub>3</sub>)C(O)- of PLLA). <sup>1</sup>H NMR spectrum suggested 43  
67 polylactide chains with DP<sub>n</sub> of 19 lactide units per chain on PEI molecule.

68 10,12-pentacosadiynoic acid (50.0 mg, 0.13 mmol) was conjugated with -OH group of  
69 polylactide as the same procedure as 4BzD-8PLLA-8DA to obtain mPEI-PLLA-DA. <sup>1</sup>H NMR  
70 (500 MHz, CDCl<sub>3</sub>, ppm): 5.14 (dd,  $J = 6.85, 13.89$  Hz, 903H, -OCH(CH<sub>3</sub>)C(O)- of PLLA),  
71 4.34 (s, 43H, terminal -OC(O)CH(CH<sub>3</sub>)-OH), 3.59 (d,  $J = 126.48$  Hz, 172H, mPEI), 2.58 (t,

72 86H, -OC(O)CH<sub>2</sub>- of DA), 2.22 (t, 172H, -(CH<sub>2</sub>)C≡C- of DA), 1.54 (m, 4214H,  
73 OCH(CH<sub>3</sub>)C(O)- of PLLA and -CH<sub>2</sub>- of DA), 0.86 (t, 129H, -CH<sub>3</sub> of DA).

74

75

76

77

78

79

80

81

82

83

84

85

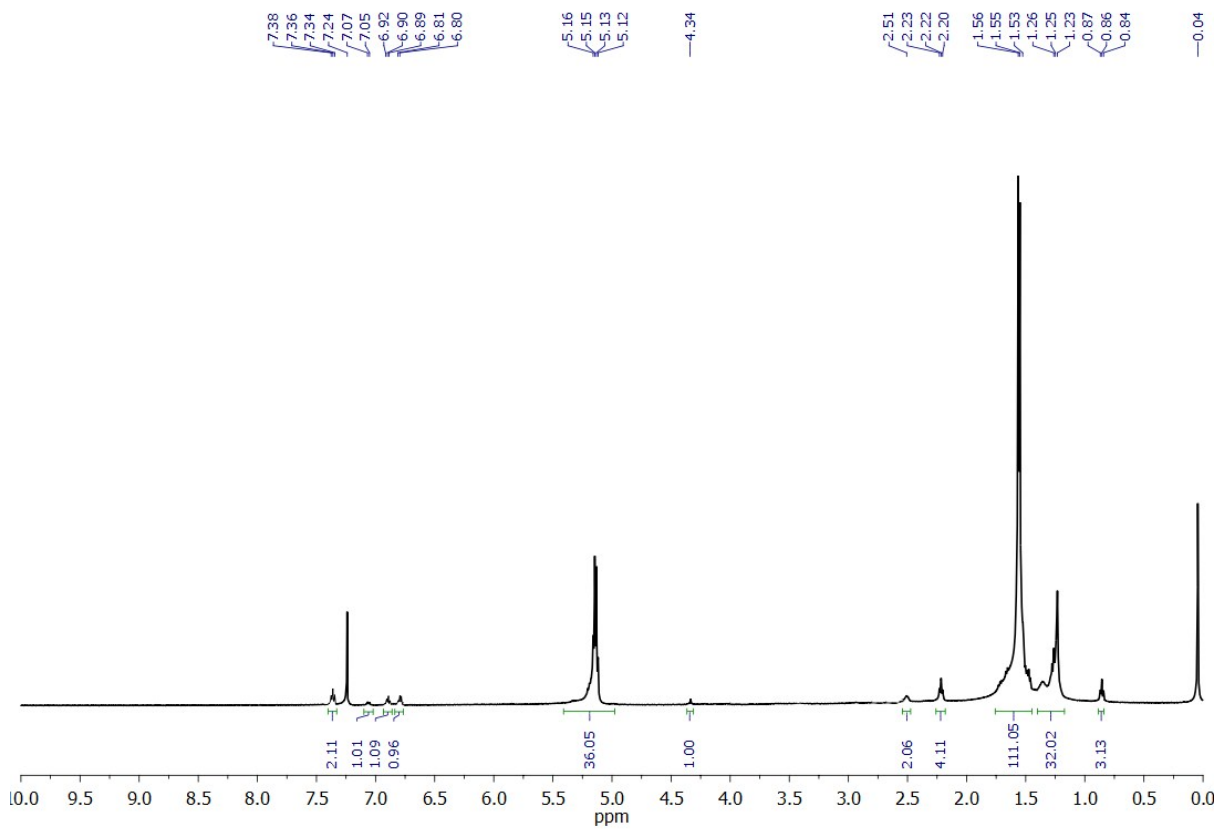

86

87 **Figure S1.**  $^1\text{H}$  NMR of PLLA-DA.

88

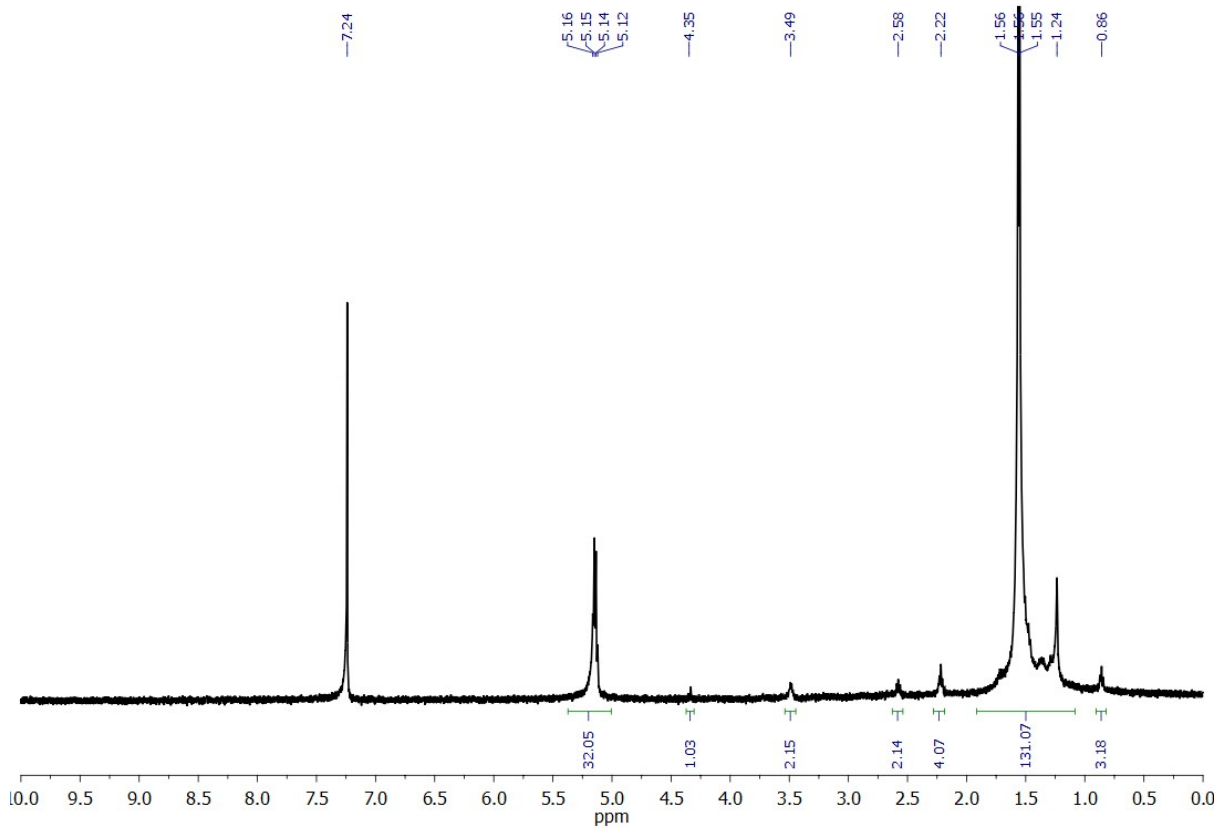

89

90 **Figure S2.**  $^1\text{H}$  NMR of 4PLLA-4DA.

91

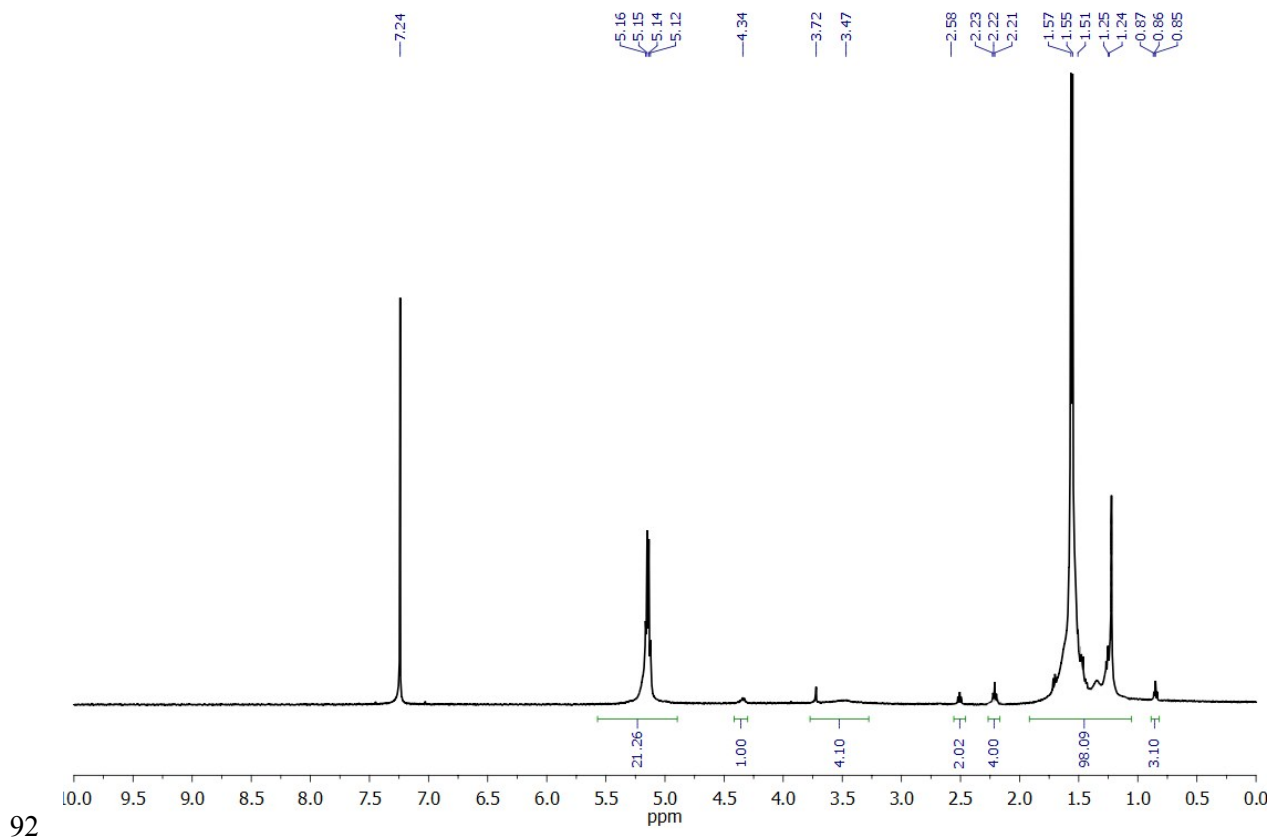

92

93 **Figure S3.**  $^1\text{H}$  NMR of mPEI-PLLA-DA.

94

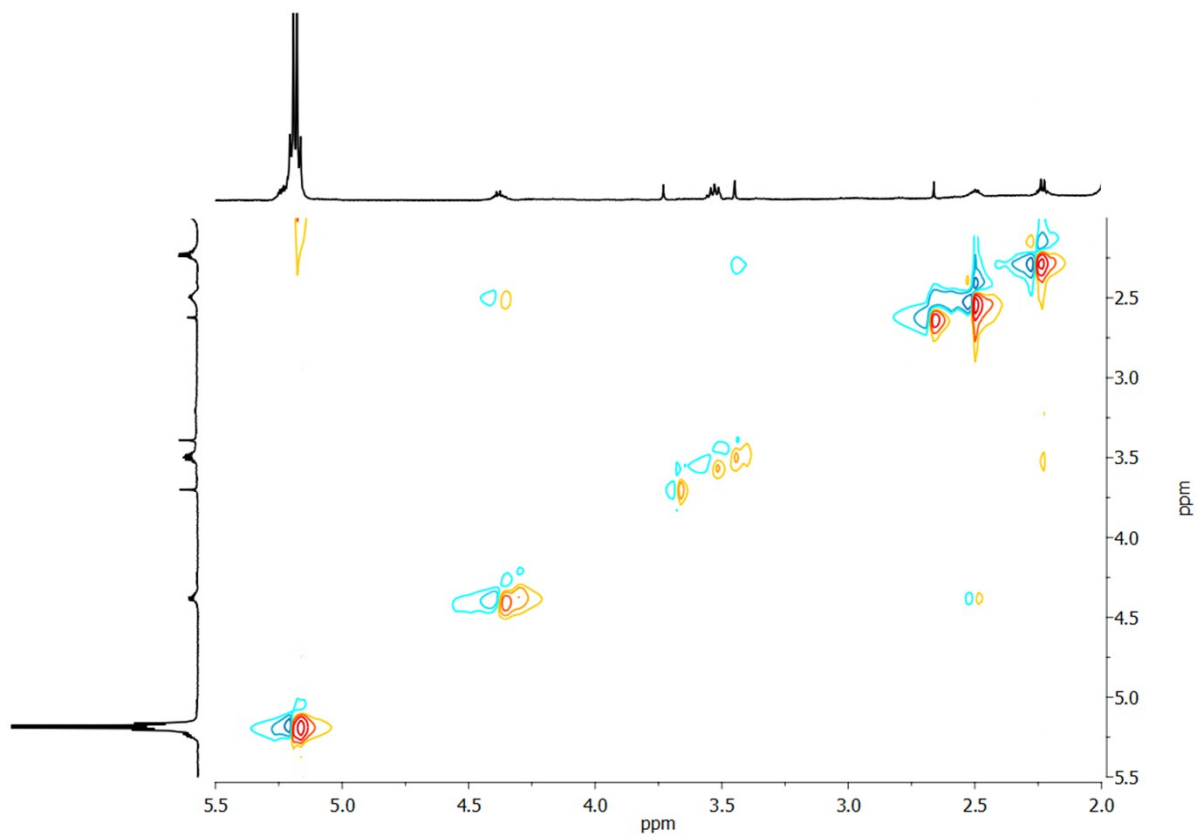

95

96 **Figure S4.** TOCSY NMR of 4BzD-8PLLA-8DA.

97



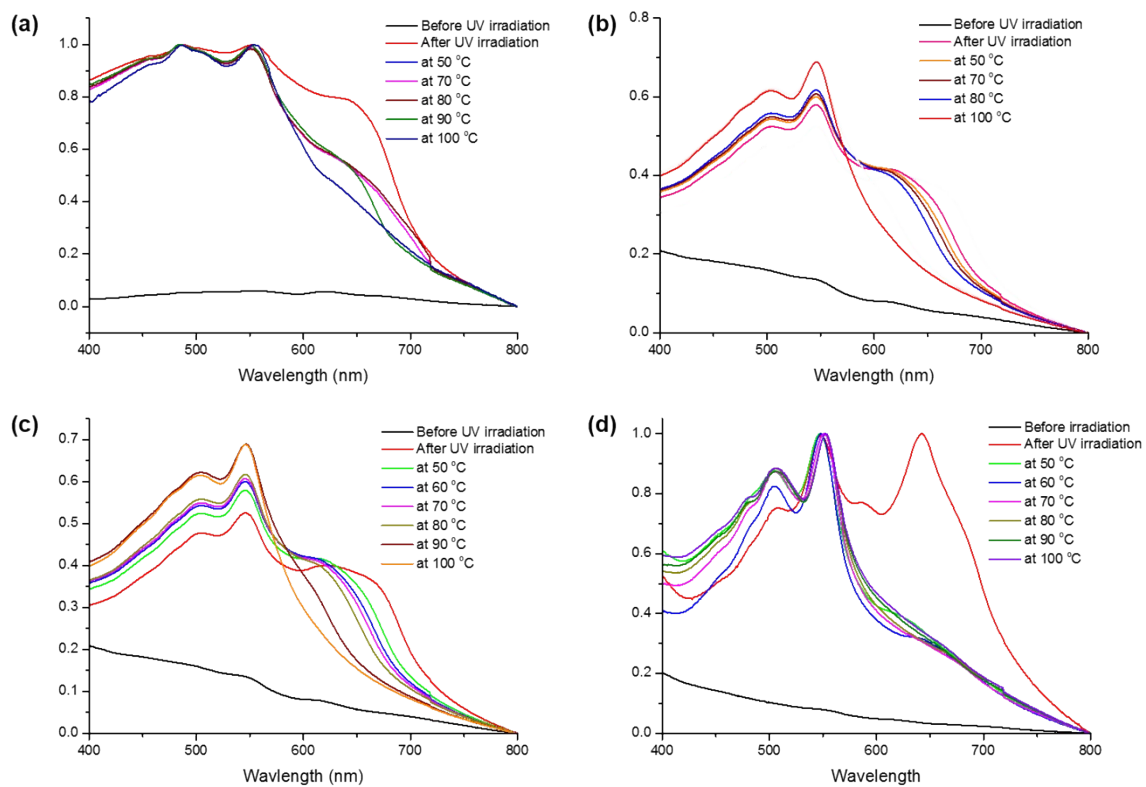

98

99 **Figure S5.** UV-Vis spectra of (a) DA, (b) PLLA-DA, (c) 4PLLA-4DA, and (d) mPEI-PLLA-  
 100 DA.

101

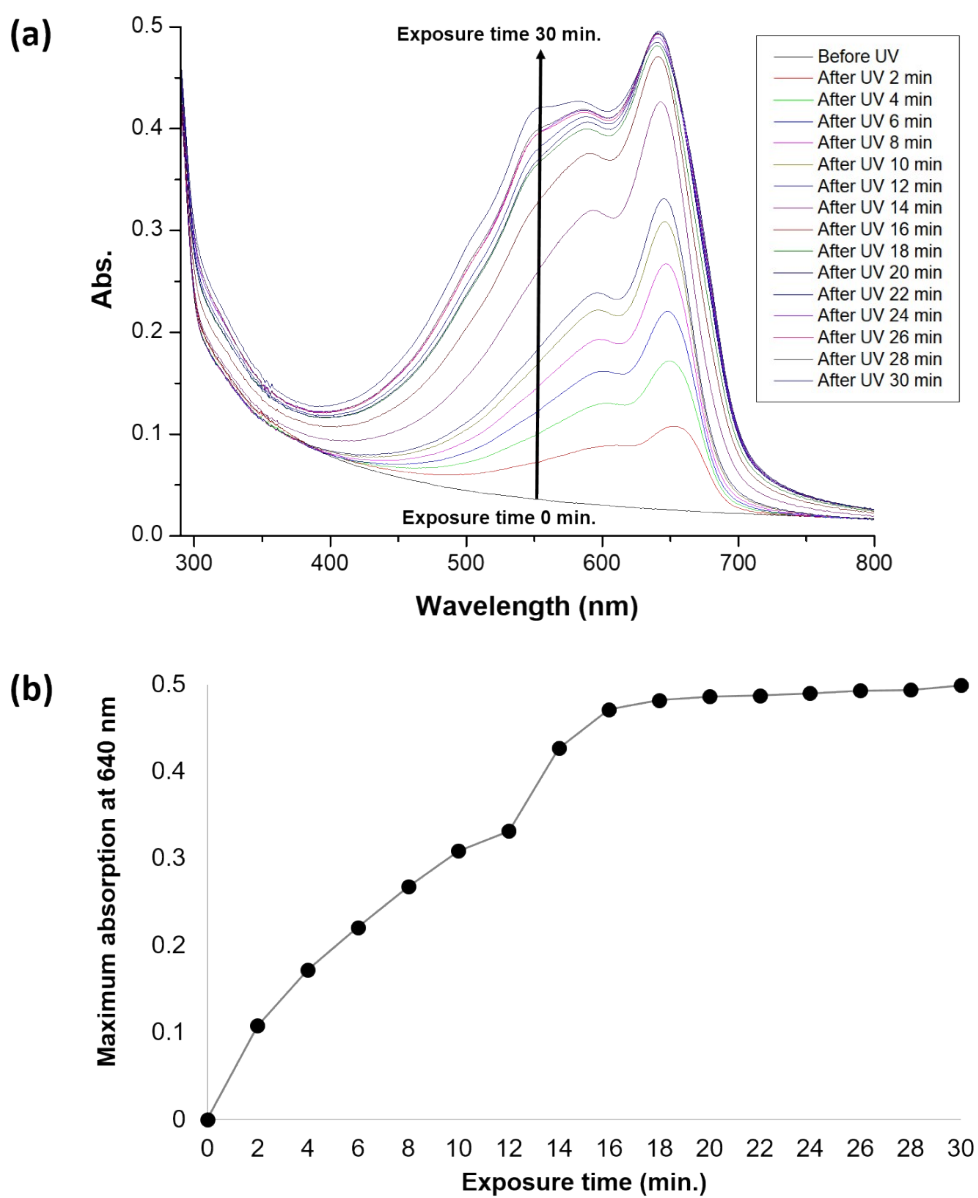

102

103 **Figure S6.** (a) UV-Vis spectra and (b) Time-resolved development of maximum absorption at  
 104 640 nm of kinetics of polymerization.

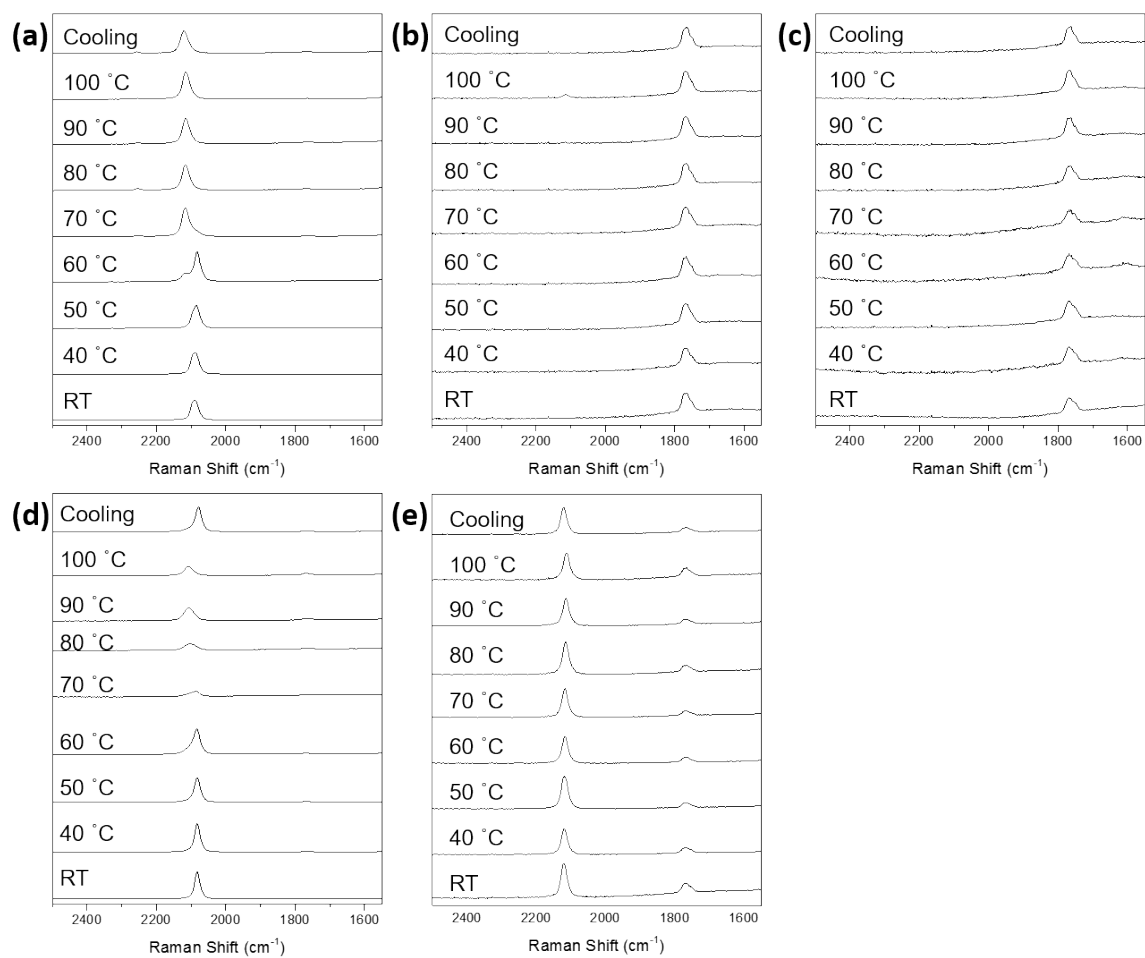

105

106 **Figure S7.** Temperature dependent Raman spectra of film (a) PDA/PLA, (b) PLLA-PDA/PLA,

107 (c) 4PLLA-4PDA/PLA, (d) 4BzD-8PLLA-8PDA/PLA and (e) mPEI-PLLA-PDA/PLA.

108

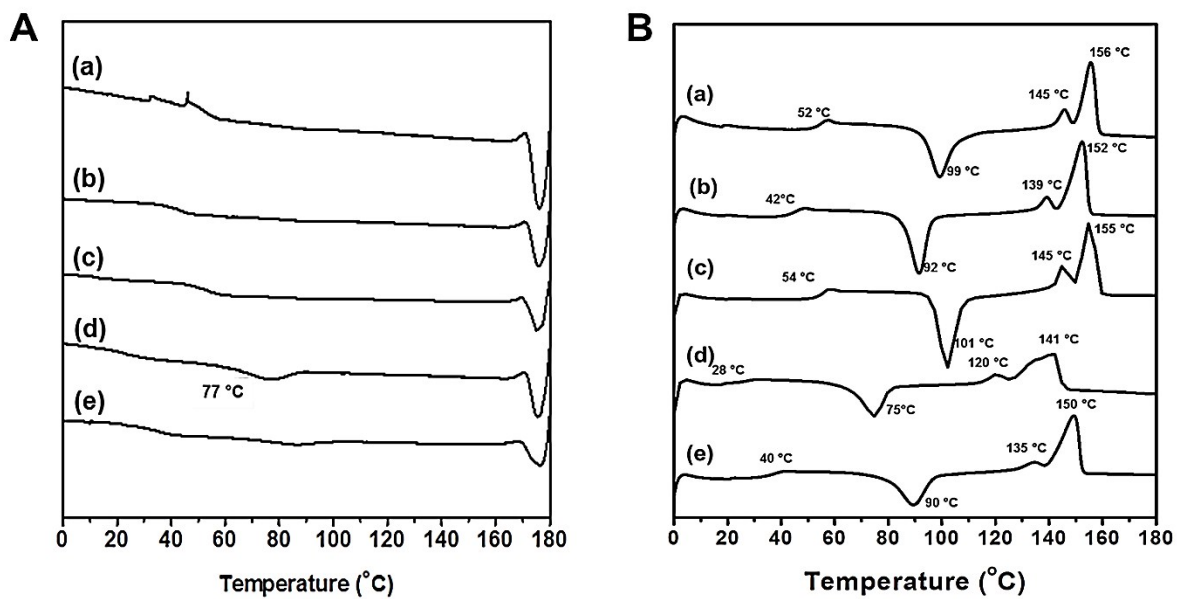

109

110 **Figure S8.** DSC thermogram of film (a) PDA/PLA, (b) PLLA-PDA/PLA, (c) 4PLLA-  
 111 4PDA/PLA, (d) 4BzD-8PLLA-8PDA/PLA and (e) mPEI-PLLA-PDA/PLA at (A) cooling scan  
 112 and (B) second heating scan.
